# Supplementary material
Source: MDPI journal article supplement (https://www.mdpi.com/1999-4907/6/10/3412)
Supplement: s1 [file s1]

Supplementary Materials

**Table S1.** Description of stocks, flows, and converters (variables and constants) of the WALFORM model (sorted alphabetically). Column AGG indicates if data are aggregated (+), specified by group of species (G), or by type of species (T).

| **Name** | **Description** | **Unit** | **AGG** |
| --- | --- | --- | --- |
| ***STOCKS (13)*** | | | |
| ASSIM HARDW | Amount of hardwood (regional + import) processed by industries | m3 | T |
| ASSIM SOFTW | Amount of softwood (regional + import) processed by industries | m3 | T |
| PRIOR TIMB | Amount of timber sold before the storm and not yet harvested | m3 | G |
| ROUNDWOOD | Amount of roundwood transported to industries | m3 | G |
| STORAGE | Amount of windfalls on storage terminals | m3 | G |
| TIMB HARV | Amount of timber to harvest (timber sold) | m3 | G |
| TIMB SALE | Amount of timber on sale | m3 | G |
| TIMB TRANSP | Amount of timber to transport (harvested) out of forests | m3 | G |
| TRANSF HARDW | Amount of regional hardwood in industries | m3 | T |
| TRANSF SOFTW | Amount of regional softwood in industries | m3 | T |
| WIND HARV | Amount of windfalls to harvest (windfalls sold + exchanged) | m3 | G |
| WIND SALE | Amount of windfalls on sale | m3 | G |
| WIND TRANSP | Amount of windfalls to transport (harvested) out of forests | m3 | G |
| ***FLOWS (18)*** | | | |
| Exp hardw | Export capacity (hardwood) | m3/month | T |
| Exp softw | Export capacity (softwood) | m3/month | T |
| Hardw | Amount of regional hardwood arriving to industries | m3/month | T |
| Hc prior | Harvesting capacity (prior timber) | m3/month | G |
| Hc timb | Harvesting capacity (timber) | m3/month | G |
| Hc wind | Harvesting capacity (windfalls) | m3/month | G |
| Ic hardw | Industrial capacity (hardwood) | m3/month | T |
| Ic softw | Industrial capacity (softwood) | m3/month | T |
| Imp hardw | Import capacity (hardwood) | m3/month | T |
| Imp softw | Import capacity (softwood) | m3/month | T |
| In timb | Amount of timber put on the market | m3/month | G |
| Pc timb | Purchase capacity (timber) | m3/month | G |
| Pc wind | Purchase capacity (windfalls) | m3/month | G |
| Softw | Amount of regional softwood arriving to industries | m3/month | T |
| Tc destock | Transport capacity of windfalls (terminals to industries) | m3/month | G |
| Tc stock | Transport capacity of windfalls (forests to terminals) | m3/month | G |
| Tc timb | Transport capacity of timber (forests to industries) | m3/month | G |
| Tc wind | Transport capacity of windfalls (forests to industries) | m3/month | G |

**Table S1.** *Cont.*

| **Name** | **Description** | **Unit** | **AGG** |
| --- | --- | --- | --- |
| ***CONVERTERS (61)*** | | | |
| dam mob | Share of storm damage put on the market | % | + |
| damage | Amount of storm damage (assessed at the regional level) | m3 | + |
| delay pay | Activation of payment delays (Yes or No) | - | + |
| demand | Variation in market demand for regional resources (per year) | % | G |
| diff harv | Differential of harvesting productivity in wind-damaged areas | % | + |
| diff imp | Differential of importation (positive or negative, per year) | % | T |
| dist store | Mean distance of transport for storage | km | + |
| ex hardw | Hardwood exported per month | m3 | T |
| ex prior hardw | Priority to hardwood export during crisis period (Yes or No) | - | T |
| ex prior softw | Priority to softwood export during crisis period (Yes or No) | - | T |
| ex soft | Softwood exported per month | m3 | T |
| exch rate | Exchange rate between windfalls and timber | % | + |
| fuel cap | Industrial demand for fuel wood | m3 | T |
| h work | Hours worked per year per truck driver | h | + |
| harv delay | Harvesting delays (for timber sold before the storm) | month | + |
| harv rate | Share of timber sold before the storm already harvested | % | + |
| harv syst | Harvesting systems (share between manual, mechanized and mixed) | % | + |
| harvesters | Number of harvesters available | - | + |
| hc inaccess | Mean inaccessibility of forest roads (per month of the year) | % | + |
| hc ratio wind | Share of harvesting capacity dedicated to windfalls | % | + |
| hc share wind | Share of harvesting capacity by type of species (windfalls) | % | G |
| hc tot | Maximal harvesting capacity | m3/month | + |
| hc tot timb | Maximal harvesting capacity for timber | m3/month | + |
| im hardw | Level of importation (hardwood) | m3/month | T |
| im softw | Level of importation (softwood) | m3/month | T |
| load unload | Time for loading and unloading trucks | h | + |
| man prod | Productivity of manual harvesting system (per workers) | m3 | + |
| mean density | Average density of wood loading | t/m3 | + |
| mean dist | Mean distance of transport from forests to industries | km | + |
| mean speed | Average truck speed | km/h | + |
| mec prod | Productivity of mechanized harvesting system (per harvester) | m3 | + |
| mma | Maximum mass authorized for trucks | t | + |
| nb trucks | Total number of trucks available | - | + |
| offer | Share of usual timber supply sold (positive or negative, per year) | % | G |
| panel cap | Industrial demand for panelling | m3 | T |
| pay delay | Payment delays (for timber sold before the storm) | %.month | + |
| pc ratio wind | Share of purchase capacity dedicated to windfalls | % | + |
| pc share wind | Share of purchase capacity by type of species (windfalls) | % | G |
| pc tot | Maximal purchase capacity | m3/month | + |
| price init | Mean stumpage prices before the storm | €/m3 | G |
| pulp cap | Industrial demand of pulpwood | m3 | T |
| red prod | Industrial productivity variation (positive or negative) | % | + |
| saw cap | Industrial demand for sawing | m3 | T |
| skidders | Number of harvesters available | - | + |

**Table S1.** *Cont.*

| **Name** | **Description** | | **Unit** | | **AGG** |
| --- | --- | --- | --- | --- | --- |
| stock | Amount to store (maximal value) | | m3 | | G |
| tare weight | Weight of the truck without loading | | t | | + |
| tc inaccess | Inaccessibility of forest roads (per month of the year) | | % | | + |
| tc ratio wind | Share of transport capacity dedicated to windfalls | | % | | + |
| tc share wind | Share of purchase capacity by type of species (windfalls) | | % | | G |
| timb dev | Devaluation of timber stumpage prices due to the storm | % | | G | |
| timb price | Timber stumpage prices after the storm | €/m3 | | G | |
| timb to pay | Amount of money to pay for timber sold before the storm | € | | + | |
| tr fact | Truck productivity factor | m3/km.t.truck | | + | |
| trucks rep | Share of transport capacity dedicated to storage operations | % | | + | |
| trucks wind | Number of trucks dedicated to windfalls transportation | - | | + | |
| vol timb init | Amount of timber sold before the storm | m3 | | G | |
| vol timb norm | Average amount of timber sold per year | m3 | | G | |
| wind dev | Devaluation of windfalls stumpage prices (first year) | % | | G | |
| wind dev supp | Devaluation of windfalls stumpage prices (after one year) | % | | G | |
| wind price | Windfalls mean stumpage prices | €/m3 | | G | |
| workforce | Number of fellers available | - | | + | |

**Table S2.** Equations used in the WALFORM model.

| **For t = 0 (initial value)** |
| --- |
| ***STOCKS (t)*** |
| 1. WIND SALE = damage × dam mob |
| 1. TIMB SALE = 0 |
| 1. WIND HARV = vol timb init × (1 − harv rate) × exch rate |
| 1. TIMB HARV = 0 |
| 1. PRIOR TIMB = vol timb init × (1 − harv rate) × (1 − exch rate) |
| 1. WIND TRANSP = 0 |
| 1. TIMB TRANSP = 0 |
| 1. ROUNDWOOD = vol timb init × harv rate |
| 1. STORAGE = 0 |
| 1. TRANSF HARDW = 0 |
| 1. TRANSF SOFTW = 0 |
| 1. ASSIM HARDW = 0 |
| 1. ASSIM SOFTW = 0 |

**Table S2.** *Cont.*

| **For t = 1 to 60 and *dt* = 1** |
| --- |
| ***STOCKS (t)*** |
| 1. WIND SALE (t) = WIND SALE (t − 1) − Pc wind (t − 1) |
| 1. TIMB SALE (t) = TIMB SALE (t − 1) + In timb (t − 1) − Pc timb (t − 1) |
| 1. WIND HARV (t) = WIND HARV (t − 1) + Pc wind (t − 1) − Hc wind (t − 1) |
| 1. TIMB HARV (t) = TIMB HARV (t − 1) + Pc timb (t − 1) − Hc timb (t − 1) |
| 1. PRIOR TIMB (t) = PRIOR TIMB (t − 1) − Hc prior (t − 1) |
| 1. WIND TRANSP (t) = WIND TRANSP (t − 1) + Hc wind (t − 1) − Tc wind (t − 1) − Tc stock (t − 1) |
| 1. TIMB TRANSP (t) = TIMB TRANSP (t − 1) + Hc prior (t − 1) + Hc timb (t − 1) − Tc timb (t − 1) |
| 1. ROUNDWOOD (t) = ROUNDWOOD (t − 1) + Tc timb (t − 1) + Tc wind (t − 1) + Tc destock (t − 1) − Exp hardw (t − 1) − Exp softw (t − 1) − Hardw (t − 1) − Softw (t − 1) |
| 1. STORAGE (t) = STORAGE (t − 1) + Tc stock (t − 1) − Tc destock (t − 1) |
| 1. TRANSF HARDW (t) = TRANSF HARDW (t − 1) + Hardw (t − 1) − Ic hardw (t − 1) |
| 1. TRANSF SOFTW (t) = TRANSF SOFTW (t − 1) + Softw (t − 1) − Ic softw (t − 1) |
| 1. ASSIM HARDW (t) = ASSIM HARDW (t − 1) + Ic Hardw (t − 1) + Imp hardw (t − 1) |
| 1. ASSIM SOFTW (t) = ASSIM SOFTW (t − 1) + Ic softw (t − 1) − Imp softw (t − 1) |
| ***FLOWS (t)*** |
| 1. Pc wind (t) = MIN [(((pc tot (t) /wind price (t)) × pc ratio wind) − Pc wind (t − 1)), WIND SALE (t)] |
| 1. Pc timb (t) = MIN [(((pc tot (t)/timb price) × (1 − pc ratio wind)) − Pc timb (t − 1)), TIMB SALE (t)] |
| 1. In timb (t) = offer (t) × vol timb norm (t) × timb rep (t) |
| 1. Hc wind (t) = MIN [(hc tot (t) × diff harv × hc ratio wind), WIND HARV (t)] |
| 1. Hc prior (t) = MIN [hc tot timb (t), PRIOR TIMB (t)] |
| 1. Hc timb (t) = MIN [(hc tot timb (t) − Hc prior (t)), TIMB HARV (t)] |
| 1. Tc timb (t) = MIN [(nb trucks × mma × tr factor × (1 − tc ratio wind) × (1/mean dist) × (1 − tc inaccess)), TIMB TRANSP (t)] |
| 1. Tc wind (t) = MIN [(trucks wind × trucks rep × mma × tr factor × (1/mean dist) × (1 − tc inaccess)), (WIND TRANSP (t) − tc stock (t))] |
| 1. Tc stock (t) = MIN [(trucks wind × trucks rep × mma × tr factor × (1/dist store) × (1 − tc inaccess)), WIND TRANSP (t), (stock − STORAGE (t − 1))] |
| 1. Tc destock (t) = MIN [(trucks wind × trucks rep × mma × tr factor × (1/dist store) × (1 − tc inaccess)), STORAGE (t)] |
| 1. Exp hardw (t) = MIN [ex hardw (t), ((ROUNDWOOD (t) − Exp softw (t) − Softw (t)) – Hardw (t))] |
| 1. Exp softw (t) = MIN [ex softw (t), ((ROUNDWOOD (t) − Exp hardw (t) − Hardw (t)) – Softw (t))] |
| 1. Hardw (t) = MIN [Ic hardw (t), (ROUNDWOOD (t) − Softw (t) − Exp hardw (t) – Exp softw (t))] |
| 1. Softw (t) = MIN [Ic softw (t), (ROUNDWOOD (t) − Hardw (t) − Exp hardw (t) – Exp softw (t))] |
| 1. Ic hardw (t) = MIN [((pulp cap + saw cap + panel cap + fuel cap) × (1 − diff imp) × red prod), TRANSF HARDW (t)] |
| 1. Ic softw (t) = MIN [((pulp cap + saw cap + panel cap + fuel cap) × (1 − diff imp) × red prod), TRANSF SOFTW (t)] |
| 1. Imp hardw (t) = im hardw (t) × diff imp (t) |
| 1. Imp softw (t) = im softw (t) × diff imp (t) |

**Table S2.** *Cont.*

| ***CONVERTERS (t)*** |
| --- |
| 1. wind price (t) = price init × (wind dev (t) + wind dev supp (t)) |
| 1. timb price = price init × timb dev |
| 1. timb to pay = (vol timb init × price init) × (1 − pay delay) |
| 1. pc tot (t) = (vol timb norm × timb price × (1+diff imp) × (1+demand)) − timb to pay |
| 1. hc tot (t) = ((man prod × workforce) + (mec prod × harvesters)) × harv syst × (1 − hc inaccess)) |
| 1. hc tot timb (t) = hc tot (t) × (1 − hc ratio wind) |
| 1. tr factor = (h work/(((mean dist/mean speed) × 2) + load unload)) × ((mma − tare weight)/mean density) |
| 1. trucks wind = nb trucks × tc ratio wind |

© 2015 by the authors; licensee MDPI, Basel, Switzerland. This article is an open access article distributed under the terms and conditions of the Creative Commons Attribution license (http://creativecommons.org/licenses/by/4.0/).
